# Supplementary material for: Antimicrobial and Immunomodulatory Effects of Selected Chemokine and Antimicrobial Peptide on Cytokine Profile during Salmonella Typhimurium Infection in Mouse
Source: MDPI journal article supplement (doi:10.3390/antibiotics11050607), 2022-04-30
Supplement: s1 [file s1]

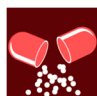

## Supplementary material

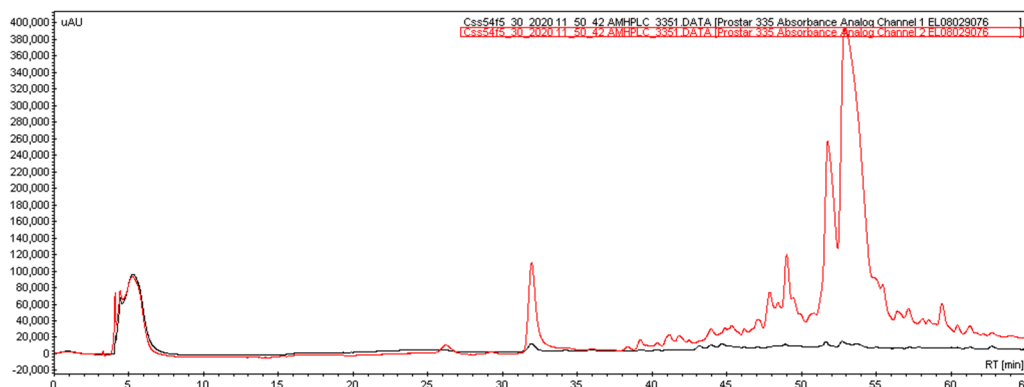

**Figure S1. Purification of Css54.** A C18 column (4.6 x 250 mm) was used with a 0–60% B gradient in 65 min, flow 1 mL / min. Solvent A: H<sub>2</sub>O + 0.1% TFA; Solvent B: Acetonitrile + 0.1% TFA. Css54 retention time: 52 min (47% B).

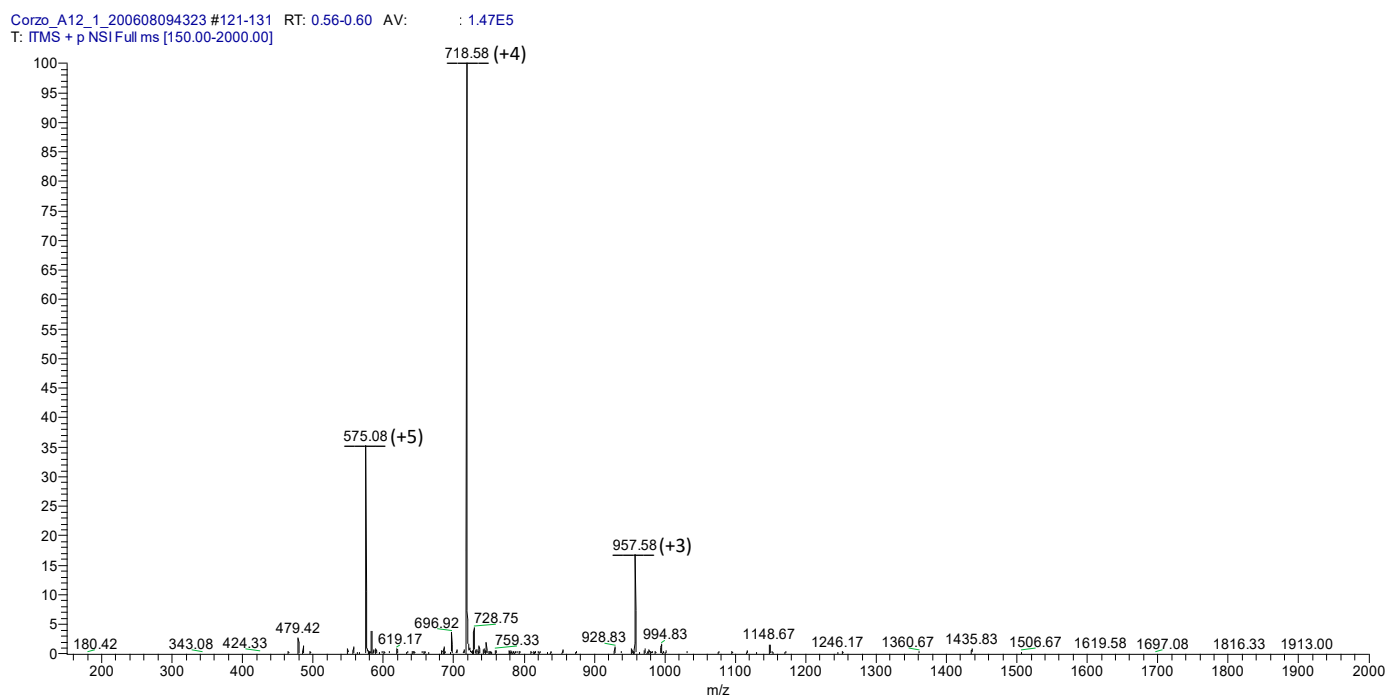

**Figure S2. Mass spectrometry analysis of Css54.**

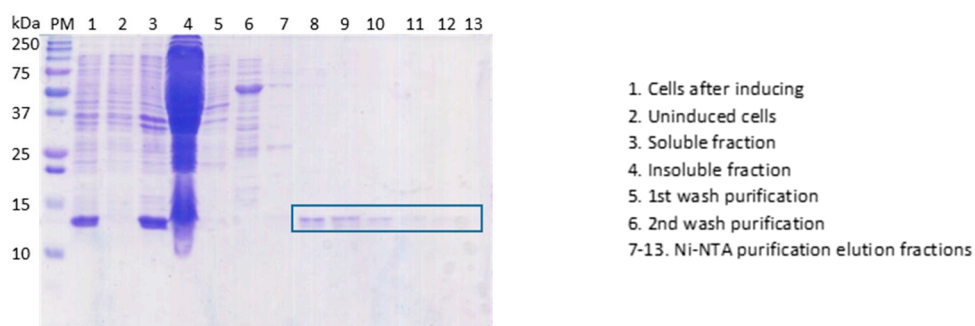

**Figure S3.** 15% SDS-PAGE gel showing MCP-1 expression and purification.

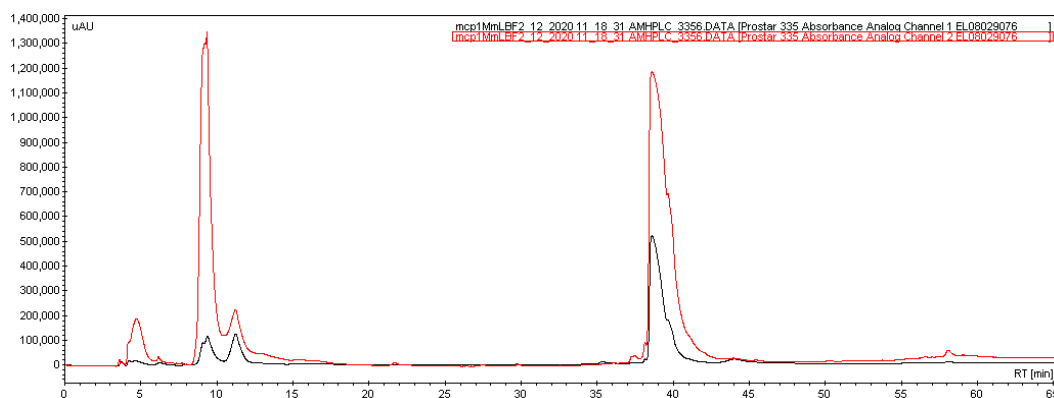

**Figure S4.** Purification of MCP-1 by RP-HPLC. Column C4 (4.6 x 250 mm). Gradient 0-60% B in 60 min, flow 1 mL / min. Solvent A: H<sub>2</sub>O + 0.1% TFA; Solvent B: Acetonitrile + 0.1% TFA. MCP-1 retention time: 37.8 min (32.8% B). The traces represent the absorbance at 230 (red) and 280 (black) nm, respectively.

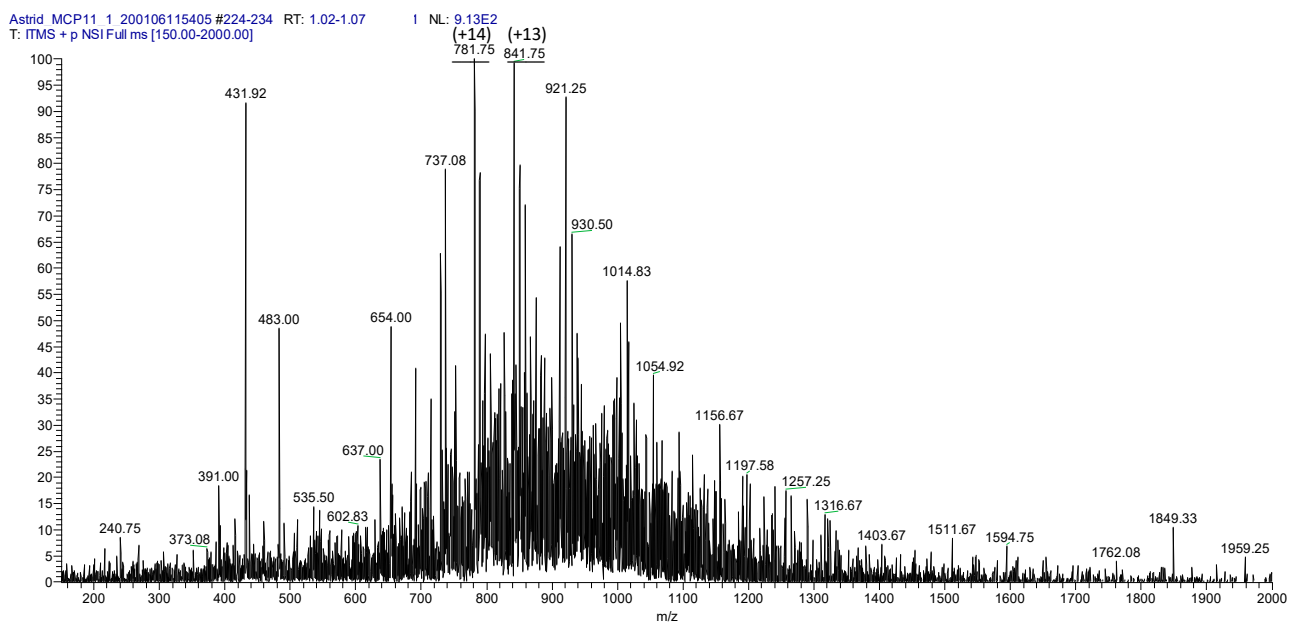

**Figure S5.** Mass spectrometry analysis of MCP-1.
